# Supplementary material for: Efficiency and Power as a Function of Sequence Coverage, SNP Array Density, and Imputation
Source: PubMed Central journal article supplement (PMC3395607; doi:10.1371/journal.pcbi.1002604), 2012-07-12

# Sensitivity and specificity of data collection strategies

41 European sample reference panel

| a         | Sens <sub>D</sub> |       |       |       |       | b         | Spec <sub>I</sub> |       |       |       |       |
|-----------|-------------------|-------|-------|-------|-------|-----------|-------------------|-------|-------|-------|-------|
|           | 0x                | .5x   | 1x    | 2x    | 4x    |           | 0x                | .5x   | 1x    | 2x    | 4x    |
| No Array  | NA                | 3.22  | 10.68 | 29.92 | 64.18 | No Array  | NA                | 98.48 | 98.84 | 99.15 | 99.46 |
| Affy 100k | 1.66              | 4.78  | 11.98 | 30.73 | 64.45 | Affy 100k | 97.63             | 98.54 | 98.88 | 99.24 | 99.46 |
| Affy 500k | 9.31              | 12.19 | 18.82 | 36.09 | 66.86 | Affy 500k | 98.27             | 98.82 | 98.98 | 99.18 | 99.41 |
| Affy 6    | 16.27             | 18.82 | 24.86 | 40.74 | 69.18 | Affy 6    | 98.86             | 98.95 | 99.19 | 99.27 | 99.46 |
| Ilmn 1M   | 23.98             | 26.30 | 31.85 | 46.14 | 72.06 | Ilmn 1M   | 99.38             | 99.29 | 99.45 | 99.51 | 99.56 |
| Omni 2.5  | 32.99             | 35.10 | 39.87 | 52.66 | 75.55 | Omni 2.5  | 99.57             | 99.56 | 99.55 | 99.57 | 99.62 |

| c         | Sens <sub>I</sub> for private variants |       |       |       |       | Sens <sub>I</sub> for .5% < MAF < 5% variants |       |       |       |       | Sens <sub>I</sub> for MAF > 5% variants |           |       |       |       |       |       |
|-----------|----------------------------------------|-------|-------|-------|-------|-----------------------------------------------|-------|-------|-------|-------|-----------------------------------------|-----------|-------|-------|-------|-------|-------|
|           | 0x                                     | .5x   | 1x    | 2x    | 4x    | 0x                                            | .5x   | 1x    | 2x    | 4x    | 0x                                      | .5x       | 1x    | 2x    | 4x    |       |       |
| No Array  | NA                                     | 19.83 | 26.26 | 41.85 | 61.47 | No Array                                      | NA    | 37.39 | 47.57 | 63.00 | 80.59                                   | No Array  | NA    | 65.84 | 77.39 | 85.78 | 92.27 |
| Affy 100k | 3.36                                   | 20.02 | 26.50 | 42.92 | 60.81 | Affy 100k                                     | 11.34 | 38.33 | 48.04 | 62.52 | 80.58                                   | Affy 100k | 16.32 | 67.35 | 77.88 | 85.84 | 92.27 |
| Affy 500k | 13.49                                  | 23.24 | 28.17 | 42.57 | 61.79 | Affy 500k                                     | 31.81 | 44.70 | 52.00 | 64.85 | 81.73                                   | Affy 500k | 55.69 | 74.33 | 80.90 | 86.89 | 92.59 |
| Affy 6    | 17.00                                  | 23.99 | 29.17 | 43.59 | 61.76 | Affy 6                                        | 41.59 | 47.82 | 54.98 | 66.05 | 82.12                                   | Affy 6    | 70.97 | 78.61 | 82.71 | 88.09 | 93.12 |
| Ilmn 1M   | 18.50                                  | 24.04 | 29.89 | 44.22 | 60.97 | Ilmn 1M                                       | 45.20 | 50.37 | 55.38 | 66.48 | 82.31                                   | Ilmn 1M   | 79.50 | 83.11 | 85.88 | 89.40 | 93.92 |
| Omni 2.5  | 20.41                                  | 26.96 | 32.56 | 44.83 | 63.03 | Omni 2.5                                      | 56.24 | 58.89 | 63.71 | 72.27 | 84.58                                   | Omni 2.5  | 83.54 | 85.64 | 87.22 | 90.27 | 94.19 |

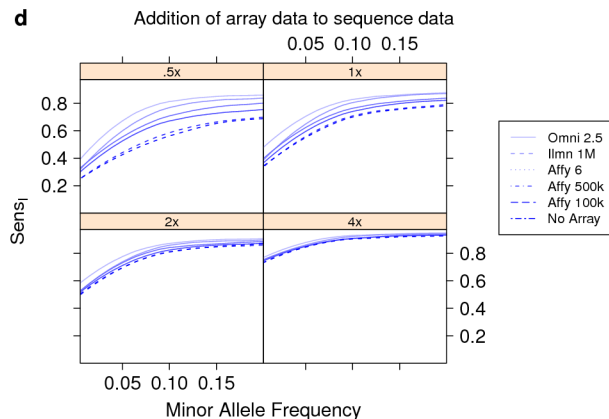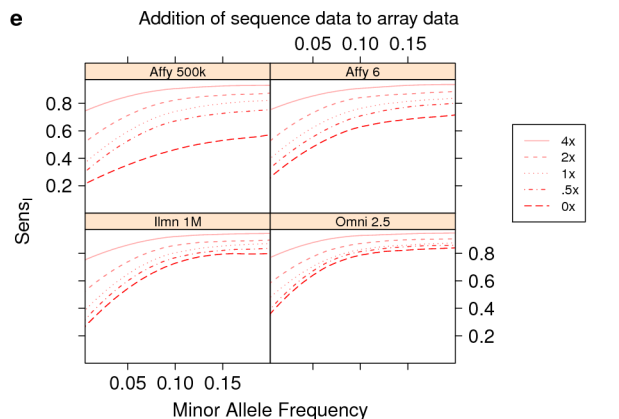

Supplement: pcbi.1002604.s004.pdf [file pcbi.1002604.s004.pdf]
