# Supplementary material for: Efficiency and Power as a Function of Sequence Coverage, SNP Array Density, and Imputation
Source: PubMed Central journal article supplement (PMC3395607; doi:10.1371/journal.pcbi.1002604), 2012-07-12

# Sensitivity and specificity of data collection strategies

41 African sample reference panel

| a         | Sens <sub>D</sub> |       |       |       |       | b         | Spec <sub>I</sub> |       |       |       |       |
|-----------|-------------------|-------|-------|-------|-------|-----------|-------------------|-------|-------|-------|-------|
|           | 0x                | .5x   | 1x    | 2x    | 4x    |           | 0x                | .5x   | 1x    | 2x    | 4x    |
| No Array  | NA                | 4.64  | 15.14 | 38.87 | 73.47 | No Array  | NA                | 97.46 | 98.14 | 98.73 | 99.24 |
| Affy 100k | 1.36              | 5.82  | 15.91 | 39.09 | 73.59 | Affy 100k | 96.65             | 97.50 | 98.21 | 98.71 | 99.24 |
| Affy 500k | 8.20              | 12.38 | 21.78 | 43.16 | 75.15 | Affy 500k | 97.99             | 97.95 | 98.16 | 98.81 | 99.21 |
| Affy 6    | 14.31             | 18.20 | 26.96 | 46.90 | 76.70 | Affy 6    | 98.07             | 98.27 | 98.54 | 98.86 | 99.26 |
| Ilmn 1M   | 20.40             | 24.02 | 32.27 | 50.87 | 78.49 | Ilmn 1M   | 98.92             | 98.86 | 98.79 | 99.08 | 99.37 |
| Omni 2.5  | 30.15             | 33.41 | 40.72 | 57.10 | 80.96 | Omni 2.5  | 99.16             | 99.12 | 99.10 | 99.29 | 99.43 |

| c         | Sens <sub>I</sub> for private variants |       |       |       |       | Sens <sub>I</sub> for .5% < MAF < 5% variants |       |       |       |       | Sens <sub>I</sub> for MAF > 5% variants |           |       |       |       |       |       |
|-----------|----------------------------------------|-------|-------|-------|-------|-----------------------------------------------|-------|-------|-------|-------|-----------------------------------------|-----------|-------|-------|-------|-------|-------|
|           | 0x                                     | .5x   | 1x    | 2x    | 4x    | 0x                                            | .5x   | 1x    | 2x    | 4x    | 0x                                      | .5x       | 1x    | 2x    | 4x    |       |       |
| No Array  | NA                                     | 18.66 | 27.84 | 46.15 | 69.15 | No Array                                      | NA    | 23.00 | 39.62 | 62.20 | 84.06                                   | No Array  | NA    | 46.61 | 64.21 | 79.00 | 90.80 |
| Affy 100k | 7.15                                   | 18.37 | 27.77 | 45.59 | 69.22 | Affy 100k                                     | 3.43  | 23.28 | 39.97 | 61.60 | 84.22                                   | Affy 100k | 5.82  | 48.32 | 65.02 | 79.04 | 90.90 |
| Affy 500k | 13.53                                  | 19.91 | 29.20 | 46.72 | 69.45 | Affy 500k                                     | 11.81 | 29.12 | 42.90 | 63.95 | 84.73                                   | Affy 500k | 30.23 | 56.17 | 68.61 | 80.69 | 91.42 |
| Affy 6    | 15.57                                  | 21.13 | 28.65 | 47.36 | 69.64 | Affy 6                                        | 20.29 | 34.29 | 45.90 | 65.36 | 85.00                                   | Affy 6    | 46.28 | 62.86 | 72.33 | 82.23 | 91.86 |
| Ilmn 1M   | 16.66                                  | 22.17 | 29.99 | 47.46 | 69.91 | Ilmn 1M                                       | 23.80 | 37.35 | 48.28 | 66.57 | 85.61                                   | Ilmn 1M   | 56.01 | 68.00 | 75.40 | 83.89 | 92.55 |
| Omni 2.5  | 19.58                                  | 24.50 | 32.41 | 47.68 | 69.94 | Omni 2.5                                      | 40.73 | 48.18 | 56.23 | 70.78 | 86.92                                   | Omni 2.5  | 68.89 | 74.86 | 79.60 | 85.77 | 93.25 |

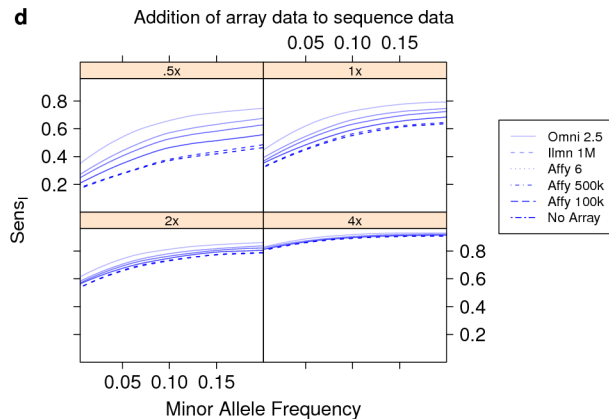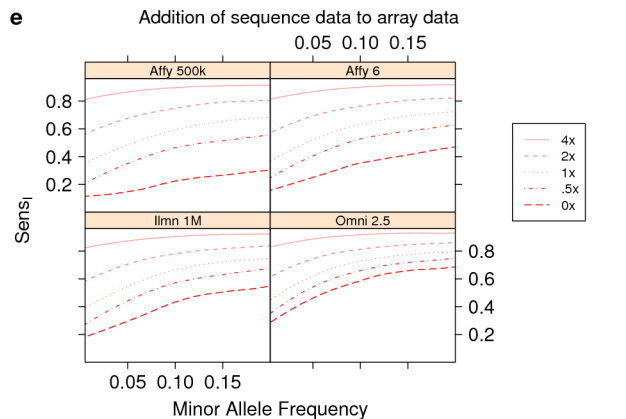

Supplement: pcbi.1002604.s005.pdf [file pcbi.1002604.s005.pdf]
