# Supplementary material for: Efficiency and Power as a Function of Sequence Coverage, SNP Array Density, and Imputation
Source: PLoS Comput Biol. 2012 Jul 12;8(7):e1002604. doi: 10.1371/journal.pcbi.1002604 (PMC3395607; doi:10.1371/journal.pcbi.1002604)
Supplement: Figure S10 — Impact of no-call threshold on sensitivity and specificity without imputation. Shown are SensD and SpecD values, as computed in Figure 2a and Figure S9a, for different Phred-scaled genotype quality thresholds; if the genotype quality is X, the posterior probability of the most likely genotype is 1–10−X. For our main analysis, we called genotypes only at sites where the genotype quality exceeded 10. (a) No genotype quality thresholds; calls at all sites where most likely genotype probability exceeds 33.3%. (b) Genotype quality threshold of 10: calls at sites where the most likely genotype probability exceeds 90%. (c) Genotype quality threshold of 20: calls at sites where the most likely genotype probability exceeds 99%. (PDF) [file pcbi.1002604.s010.pdf]

# Impact of no-call threshold on sensitivity and specificity without imputation

381 European sample reference panel

**a** Genotype quality threshold: None

|           | Sens <sub>D</sub> |       |       |       |       |           | Spec <sub>D</sub> |       |       |       |       |
|-----------|-------------------|-------|-------|-------|-------|-----------|-------------------|-------|-------|-------|-------|
|           | 0x                | .5x   | 1x    | 2x    | 4x    |           | 0x                | .5x   | 1x    | 2x    | 4x    |
| No Array  | NA                | 15.08 | 27.85 | 50.08 | 74.98 | No Array  | NA                | 79.29 | 82.77 | 88.80 | 94.76 |
| Affy 100k | 1.70              | 16.53 | 28.95 | 50.65 | 75.37 | Affy 100k | 99.76             | 81.09 | 83.80 | 89.19 | 94.89 |
| Affy 500k | 9.40              | 22.77 | 34.07 | 53.92 | 76.78 | Affy 500k | 98.92             | 86.52 | 86.79 | 90.40 | 95.28 |
| Affy 6    | 16.60             | 28.70 | 39.03 | 57.42 | 78.55 | Affy 6    | 99.70             | 89.94 | 88.99 | 91.15 | 95.21 |
| Ilmn 1M   | 24.55             | 35.62 | 44.82 | 61.41 | 80.49 | Ilmn 1M   | 99.94             | 92.59 | 91.32 | 92.63 | 95.84 |
| Omni 2.5  | 31.51             | 41.69 | 50.08 | 64.86 | 81.87 | Omni 2.5  | 99.80             | 94.25 | 92.87 | 93.86 | 96.61 |

**b** Genotype quality threshold: 10

|           | Sens <sub>D</sub> |       |       |       |       |           | Spec <sub>D</sub> |       |       |       |       |
|-----------|-------------------|-------|-------|-------|-------|-----------|-------------------|-------|-------|-------|-------|
|           | 0x                | .5x   | 1x    | 2x    | 4x    |           | 0x                | .5x   | 1x    | 2x    | 4x    |
| No Array  | NA                | 4.55  | 12.02 | 31.18 | 61.34 | No Array  | NA                | 98.97 | 99.10 | 98.32 | 98.44 |
| Affy 100k | 1.70              | 6.16  | 13.42 | 32.11 | 61.96 | Affy 100k | 99.88             | 99.24 | 99.19 | 98.42 | 98.49 |
| Affy 500k | 9.38              | 13.51 | 20.09 | 37.19 | 64.49 | Affy 500k | 99.35             | 99.36 | 99.27 | 98.62 | 98.61 |
| Affy 6    | 16.56             | 20.32 | 26.25 | 41.86 | 66.87 | Affy 6    | 99.86             | 99.69 | 99.60 | 98.96 | 98.77 |
| Ilmn 1M   | 24.55             | 27.94 | 33.36 | 47.35 | 70.03 | Ilmn 1M   | 99.94             | 99.82 | 99.69 | 99.17 | 98.91 |
| Omni 2.5  | 31.51             | 34.60 | 39.46 | 51.97 | 72.38 | Omni 2.5  | 99.80             | 99.77 | 99.73 | 99.24 | 99.04 |

**c** Genotype quality threshold: 20

|           | Sens <sub>D</sub> |       |       |       |       |           | Spec <sub>D</sub> |       |       |       |       |
|-----------|-------------------|-------|-------|-------|-------|-----------|-------------------|-------|-------|-------|-------|
|           | 0x                | .5x   | 1x    | 2x    | 4x    |           | 0x                | .5x   | 1x    | 2x    | 4x    |
| No Array  | NA                | 3.44  | 8.66  | 20.92 | 42.10 | No Array  | NA                | 99.76 | 99.81 | 99.80 | 99.86 |
| Affy 100k | 1.69              | 5.08  | 10.13 | 22.08 | 43.08 | Affy 100k | 99.88             | 99.80 | 99.82 | 99.83 | 99.86 |
| Affy 500k | 9.29              | 12.46 | 17.03 | 28.08 | 47.32 | Affy 500k | 99.67             | 99.74 | 99.75 | 99.79 | 99.86 |
| Affy 6    | 16.45             | 19.37 | 23.50 | 33.65 | 51.16 | Affy 6    | 99.90             | 99.88 | 99.88 | 99.88 | 99.90 |
| Ilmn 1M   | 24.55             | 27.13 | 30.88 | 39.94 | 55.82 | Ilmn 1M   | 99.94             | 99.93 | 99.91 | 99.88 | 99.90 |
| Omni 2.5  | 31.50             | 33.85 | 37.33 | 45.21 | 59.51 | Omni 2.5  | 99.83             | 99.87 | 99.87 | 99.85 | 99.89 |
