# Supplementary material for: Efficiency and Power as a Function of Sequence Coverage, SNP Array Density, and Imputation
Source: PubMed Central journal article supplement (PMC3395607; doi:10.1371/journal.pcbi.1002604), 2012-07-12
Supplement: pcbi.1002604.s003.pdf [file pcbi.1002604.s003.pdf]

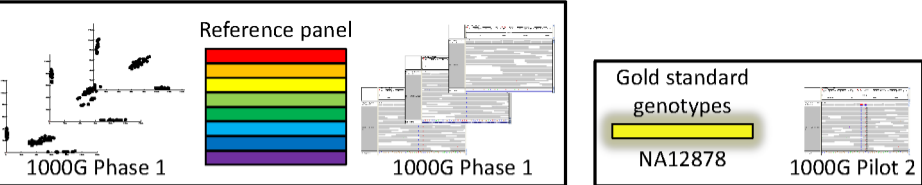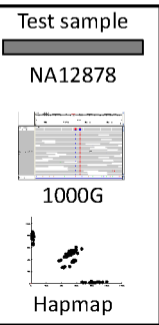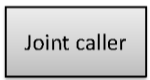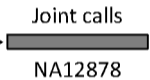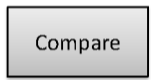

|           | 0x    | .5x   | 1x    | 2x    | 4x    |
|-----------|-------|-------|-------|-------|-------|
| No Array  | NA    | 4.55  | 12.02 | 31.18 | 61.34 |
| Affy 100k | 1.70  | 6.16  | 13.42 | 32.11 | 61.96 |
| Affy 500k | 9.38  | 13.51 | 20.09 | 37.19 | 64.49 |
| Affy 6    | 16.56 | 20.32 | 26.25 | 41.86 | 66.87 |
| Ilmn 1M   | 24.55 | 27.94 | 33.36 | 47.35 | 70.03 |
| Omni 2.5  | 31.51 | 34.60 | 39.46 | 51.97 | 72.38 |

Sensitivity  
Specificity
