# Supplementary material for: Efficiency and Power as a Function of Sequence Coverage, SNP Array Density, and Imputation
Source: PubMed Central journal article supplement (PMC3395607; doi:10.1371/journal.pcbi.1002604), 2012-07-12
Supplement: pcbi.1002604.s006.pdf [file pcbi.1002604.s006.pdf]

## Sensitivity and specificity of data collection strategies without a reference panel

**a**

42 European samples sequenced

|             | $Sens_I$ |       |       |       |       |             | $Spec_I$ |       |       |       |       |
|-------------|----------|-------|-------|-------|-------|-------------|----------|-------|-------|-------|-------|
|             | 0x       | .5x   | 1x    | 2x    | 4x    |             | 0x       | .5x   | 1x    | 2x    | 4x    |
| No Array    | NA       | 3.25  | 14.84 | 62.09 | 88.41 | No Array    | NA       | 98.95 | 97.98 | 98.59 | 99.40 |
| Affy 100k   | 1.66     | 4.84  | 17.59 | 63.64 | 88.77 | Affy 100k   | 99.88    | 99.18 | 98.37 | 98.69 | 99.50 |
| Affy 500k   | 9.37     | 12.49 | 28.12 | 68.17 | 89.41 | Affy 500k   | 99.79    | 99.40 | 98.76 | 98.97 | 99.42 |
| Affy 6      | 16.39    | 19.34 | 36.57 | 71.93 | 89.94 | Affy 6      | 99.82    | 99.50 | 99.04 | 99.19 | 99.49 |
| Illumina 1M | 24.02    | 26.91 | 44.84 | 76.41 | 90.96 | Illumina 1M | 99.88    | 99.75 | 99.22 | 99.30 | 99.56 |
| Omni 2.5    | 32.99    | 35.95 | 53.95 | 81.32 | 92.18 | Omni 2.5    | 99.87    | 99.73 | 99.32 | 99.47 | 99.62 |

**b**

42 African samples sequenced

|             | $Sens_I$ |       |       |       |       |             | $Spec_I$ |       |       |       |       |
|-------------|----------|-------|-------|-------|-------|-------------|----------|-------|-------|-------|-------|
|             | 0x       | .5x   | 1x    | 2x    | 4x    |             | 0x       | .5x   | 1x    | 2x    | 4x    |
| No Array    | NA       | 4.66  | 15.68 | 48.49 | 86.36 | No Array    | NA       | 99.40 | 98.59 | 98.09 | 99.13 |
| Affy 100k   | 1.37     | 5.85  | 16.96 | 50.55 | 87.09 | Affy 100k   | 99.65    | 99.35 | 98.76 | 98.29 | 99.16 |
| Affy 500k   | 8.22     | 12.53 | 23.86 | 55.59 | 88.06 | Affy 500k   | 99.81    | 99.59 | 99.01 | 98.54 | 99.22 |
| Affy 6      | 14.44    | 18.54 | 29.89 | 59.87 | 88.82 | Affy 6      | 99.59    | 99.51 | 99.01 | 98.72 | 99.26 |
| Illumina 1M | 20.40    | 24.33 | 35.51 | 64.06 | 89.59 | Illumina 1M | 99.95    | 99.78 | 99.30 | 98.89 | 99.37 |
| Omni 2.5    | 30.15    | 33.87 | 44.49 | 70.02 | 90.99 | Omni 2.5    | 99.86    | 99.76 | 99.29 | 99.08 | 99.43 |
