# Supplementary material for: Efficiency and Power as a Function of Sequence Coverage, SNP Array Density, and Imputation
Source: PubMed Central journal article supplement (PMC3395607; doi:10.1371/journal.pcbi.1002604), 2012-07-12

## Sensitivity gains from investment

**a**

381 European sample reference panel

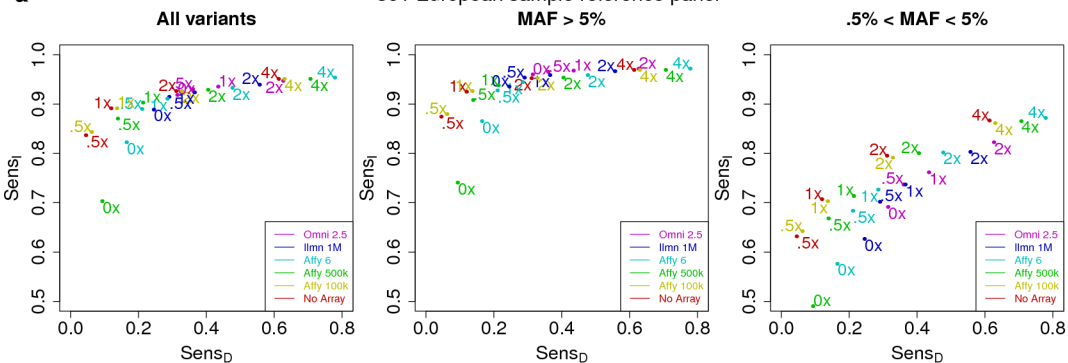

**b**

41 European sample reference panel

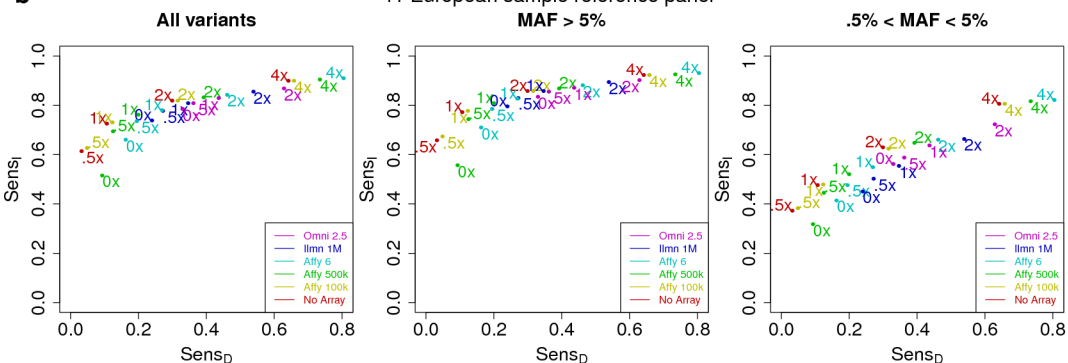

**c**

41 African sample reference panel

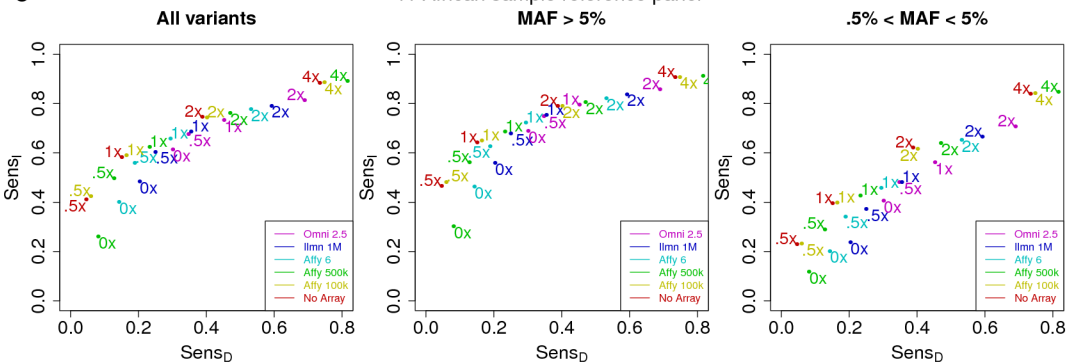

Supplement: pcbi.1002604.s008.pdf [file pcbi.1002604.s008.pdf]
