# Supplementary material for: Efficiency and Power as a Function of Sequence Coverage, SNP Array Density, and Imputation
Source: PubMed Central journal article supplement (PMC3395607; doi:10.1371/journal.pcbi.1002604), 2012-07-12
Supplement: pcbi.1002604.s009.pdf [file pcbi.1002604.s009.pdf]

## Specificity with and without imputation

### 381 European sample reference panel

**a**

|           | Spec <sub>D</sub> |       |       |       |       |           | Spec <sub>I</sub> |       |       |       |       |
|-----------|-------------------|-------|-------|-------|-------|-----------|-------------------|-------|-------|-------|-------|
|           | 0x                | .5x   | 1x    | 2x    | 4x    |           | 0x                | .5x   | 1x    | 2x    | 4x    |
| No Array  | NA                | 98.97 | 99.10 | 98.32 | 98.44 | No Array  | NA                | 99.39 | 99.48 | 99.68 | 99.72 |
| Affy 100k | 99.88             | 99.24 | 99.19 | 98.42 | 98.49 | Affy 100k | 97.53             | 99.33 | 99.48 | 99.66 | 99.70 |
| Affy 500k | 99.35             | 99.36 | 99.27 | 98.62 | 98.61 | Affy 500k | 98.61             | 99.36 | 99.46 | 99.60 | 99.68 |
| Affy 6    | 99.86             | 99.69 | 99.60 | 98.96 | 98.77 | Affy 6    | 99.27             | 99.48 | 99.49 | 99.62 | 99.67 |
| Ilmn 1M   | 99.94             | 99.82 | 99.69 | 99.17 | 98.91 | Ilmn 1M   | 99.63             | 99.70 | 99.70 | 99.74 | 99.78 |
| Omni 2.5  | 99.80             | 99.77 | 99.73 | 99.24 | 99.04 | Omni 2.5  | 99.75             | 99.78 | 99.75 | 99.80 | 99.83 |

### 41 European sample reference panel

**b**

|           | Spec <sub>D</sub> |       |       |       |       |           | Spec <sub>I</sub> |       |       |       |       |
|-----------|-------------------|-------|-------|-------|-------|-----------|-------------------|-------|-------|-------|-------|
|           | 0x                | .5x   | 1x    | 2x    | 4x    |           | 0x                | .5x   | 1x    | 2x    | 4x    |
| No Array  | NA                | 98.94 | 98.74 | 98.16 | 98.11 | No Array  | NA                | 98.48 | 98.84 | 99.15 | 99.46 |
| Affy 100k | 99.88             | 99.26 | 98.88 | 98.24 | 98.17 | Affy 100k | 97.63             | 98.54 | 98.88 | 99.24 | 99.46 |
| Affy 500k | 99.51             | 99.40 | 99.19 | 98.59 | 98.37 | Affy 500k | 98.27             | 98.82 | 98.98 | 99.18 | 99.41 |
| Affy 6    | 99.73             | 99.54 | 99.45 | 98.86 | 98.57 | Affy 6    | 98.86             | 98.95 | 99.19 | 99.27 | 99.46 |
| Ilmn 1M   | 99.93             | 99.83 | 99.61 | 99.09 | 98.75 | Ilmn 1M   | 99.38             | 99.29 | 99.45 | 99.51 | 99.56 |
| Omni 2.5  | 99.87             | 99.79 | 99.62 | 99.28 | 98.91 | Omni 2.5  | 99.57             | 99.56 | 99.55 | 99.57 | 99.62 |

### 41 African sample reference panel

**c**

|           | Spec <sub>D</sub> |       |       |       |       |           | Spec <sub>I</sub> |       |       |       |       |
|-----------|-------------------|-------|-------|-------|-------|-----------|-------------------|-------|-------|-------|-------|
|           | 0x                | .5x   | 1x    | 2x    | 4x    |           | 0x                | .5x   | 1x    | 2x    | 4x    |
| No Array  | NA                | 99.33 | 98.89 | 98.09 | 98.00 | No Array  | NA                | 97.46 | 98.14 | 98.73 | 99.24 |
| Affy 100k | 99.53             | 99.40 | 99.00 | 98.17 | 98.08 | Affy 100k | 96.65             | 97.50 | 98.21 | 98.71 | 99.24 |
| Affy 500k | 99.81             | 99.60 | 99.31 | 98.43 | 98.21 | Affy 500k | 97.99             | 97.95 | 98.16 | 98.81 | 99.21 |
| Affy 6    | 99.52             | 99.55 | 99.33 | 98.60 | 98.33 | Affy 6    | 98.07             | 98.27 | 98.54 | 98.86 | 99.26 |
| Ilmn 1M   | 99.95             | 99.83 | 99.53 | 98.83 | 98.49 | Ilmn 1M   | 98.92             | 98.86 | 98.79 | 99.08 | 99.37 |
| Omni 2.5  | 99.86             | 99.84 | 99.59 | 99.04 | 98.66 | Omni 2.5  | 99.16             | 99.12 | 99.10 | 99.29 | 99.43 |
