# Supplementary material for: Efficiency and Power as a Function of Sequence Coverage, SNP Array Density, and Imputation
Source: PubMed Central journal article supplement (PMC3395607; doi:10.1371/journal.pcbi.1002604), 2012-07-12
Supplement: pcbi.1002604.s011.pdf [file pcbi.1002604.s011.pdf]

# Impact of no-call threshold on sensitivity and specificity with imputation

381 European sample reference panel

**a**

Genotype quality threshold: None

|           | Sens <sub>1</sub> |       |       |       |       | Spec <sub>1</sub> |       |       |       |       |       |
|-----------|-------------------|-------|-------|-------|-------|-------------------|-------|-------|-------|-------|-------|
|           | 0x                | .5x   | 1x    | 2x    | 4x    | 0x                | .5x   | 1x    | 2x    | 4x    |       |
| No Array  | NA                | 92.42 | 94.41 | 96.11 | 97.26 | No Array          | NA    | 98.35 | 98.89 | 99.31 | 99.51 |
| Affy 100k | 50.58             | 92.66 | 94.46 | 96.08 | 97.22 | Affy 100k         | 88.86 | 98.38 | 98.96 | 99.31 | 99.51 |
| Affy 500k | 85.98             | 93.62 | 94.81 | 96.11 | 97.16 | Affy 500k         | 96.06 | 98.53 | 98.94 | 99.26 | 99.48 |
| Affy 6    | 91.14             | 94.25 | 95.08 | 96.31 | 97.32 | Affy 6            | 98.15 | 98.82 | 99.07 | 99.34 | 99.49 |
| Ilmn 1M   | 93.92             | 95.28 | 95.75 | 96.57 | 97.48 | Ilmn 1M           | 99.18 | 99.36 | 99.47 | 99.50 | 99.63 |
| Omni 2.5  | 95.29             | 96.11 | 96.36 | 96.98 | 97.67 | Omni 2.5          | 99.53 | 99.57 | 99.60 | 99.62 | 99.70 |

**b**

Genotype quality threshold: 10

|           | Sens <sub>1</sub> |       |       |       |       | Spec <sub>1</sub> |       |       |       |       |       |
|-----------|-------------------|-------|-------|-------|-------|-------------------|-------|-------|-------|-------|-------|
|           | 0x                | .5x   | 1x    | 2x    | 4x    | 0x                | .5x   | 1x    | 2x    | 4x    |       |
| No Array  | NA                | 83.74 | 89.11 | 92.63 | 95.18 | No Array          | NA    | 99.39 | 99.48 | 99.68 | 99.72 |
| Affy 100k | 25.56             | 84.30 | 89.22 | 92.61 | 95.07 | Affy 100k         | 97.53 | 99.33 | 99.48 | 99.66 | 99.70 |
| Affy 500k | 70.35             | 87.13 | 90.35 | 92.89 | 95.17 | Affy 500k         | 98.61 | 99.36 | 99.46 | 99.60 | 99.68 |
| Affy 6    | 82.22             | 89.04 | 91.13 | 93.33 | 95.41 | Affy 6            | 99.27 | 99.48 | 99.49 | 99.62 | 99.67 |
| Ilmn 1M   | 88.96             | 91.50 | 92.46 | 94.02 | 95.81 | Ilmn 1M           | 99.63 | 99.70 | 99.70 | 99.74 | 99.78 |
| Omni 2.5  | 91.93             | 92.99 | 93.57 | 94.72 | 96.10 | Omni 2.5          | 99.75 | 99.78 | 99.75 | 99.80 | 99.83 |

**c**

Genotype quality threshold: 20

|           | Sens <sub>1</sub> |       |       |       |       | Spec <sub>1</sub> |       |       |       |       |       |
|-----------|-------------------|-------|-------|-------|-------|-------------------|-------|-------|-------|-------|-------|
|           | 0x                | .5x   | 1x    | 2x    | 4x    | 0x                | .5x   | 1x    | 2x    | 4x    |       |
| No Array  | NA                | 59.23 | 71.15 | 80.39 | 88.73 | No Array          | NA    | 99.73 | 99.82 | 99.87 | 99.88 |
| Affy 100k | 9.45              | 60.71 | 71.28 | 80.60 | 88.62 | Affy 100k         | 99.09 | 99.70 | 99.77 | 99.85 | 99.85 |
| Affy 500k | 43.68             | 66.28 | 73.95 | 81.74 | 89.17 | Affy 500k         | 99.38 | 99.69 | 99.74 | 99.81 | 99.83 |
| Affy 6    | 58.68             | 70.64 | 76.33 | 82.82 | 89.68 | Affy 6            | 99.60 | 99.74 | 99.73 | 99.77 | 99.83 |
| Ilmn 1M   | 67.84             | 75.27 | 78.98 | 84.42 | 90.52 | Ilmn 1M           | 99.84 | 99.86 | 99.85 | 99.88 | 99.89 |
| Omni 2.5  | 73.28             | 78.03 | 80.67 | 85.49 | 90.89 | Omni 2.5          | 99.90 | 99.90 | 99.88 | 99.91 | 99.90 |
