# Supplementary material for: Efficiency and Power as a Function of Sequence Coverage, SNP Array Density, and Imputation
Source: PubMed Central journal article supplement (PMC3395607; doi:10.1371/journal.pcbi.1002604), 2012-07-12
Supplement: pcbi.1002604.s012.pdf [file pcbi.1002604.s012.pdf]

# Sensitivity and specificity at heterozygous and homozygous non-reference sites

381 European sample reference panel

**a**

Heterozygous variants

|             | Sens <sub>I</sub> |       |       |       |       |             | Spec <sub>I</sub> |       |       |       |       |
|-------------|-------------------|-------|-------|-------|-------|-------------|-------------------|-------|-------|-------|-------|
|             | 0x                | .5x   | 1x    | 2x    | 4x    |             | 0x                | .5x   | 1x    | 2x    | 4x    |
| No Array    | NA                | 79.85 | 86.40 | 90.53 | 93.63 | No Array    | NA                | 99.55 | 99.62 | 99.79 | 99.84 |
| Affy 100k   | 21.50             | 80.44 | 86.62 | 90.46 | 93.53 | Affy 100k   | 98.59             | 99.57 | 99.65 | 99.77 | 99.79 |
| Affy 500k   | 65.38             | 84.20 | 88.00 | 90.90 | 93.74 | Affy 500k   | 98.60             | 99.39 | 99.52 | 99.65 | 99.75 |
| Affy 6      | 78.62             | 86.48 | 88.94 | 91.50 | 94.07 | Affy 6      | 99.34             | 99.54 | 99.57 | 99.69 | 99.71 |
| Illumina 1M | 86.29             | 89.17 | 90.34 | 92.21 | 94.43 | Illumina 1M | 99.75             | 99.80 | 99.79 | 99.86 | 99.88 |
| Omni 2.5    | 89.89             | 90.98 | 91.64 | 92.98 | 94.78 | Omni 2.5    | 99.81             | 99.86 | 99.83 | 99.87 | 99.91 |

**b**

Homozygous variants

|             | Sens <sub>I</sub> |       |       |       |       |             | Spec <sub>I</sub> |       |       |       |       |
|-------------|-------------------|-------|-------|-------|-------|-------------|-------------------|-------|-------|-------|-------|
|             | 0x                | .5x   | 1x    | 2x    | 4x    |             | 0x                | .5x   | 1x    | 2x    | 4x    |
| No Array    | NA                | 91.42 | 94.49 | 96.79 | 98.25 | No Array    | NA                | 99.12 | 99.21 | 99.47 | 99.48 |
| Affy 100k   | 33.61             | 91.95 | 94.39 | 96.86 | 98.12 | Affy 100k   | 96.22             | 98.90 | 99.19 | 99.46 | 99.51 |
| Affy 500k   | 80.17             | 92.93 | 95.01 | 96.82 | 97.98 | Affy 500k   | 98.62             | 99.31 | 99.37 | 99.50 | 99.55 |
| Affy 6      | 89.34             | 94.11 | 95.45 | 96.93 | 98.05 | Affy 6      | 99.14             | 99.39 | 99.34 | 99.49 | 99.59 |
| Illumina 1M | 94.25             | 96.12 | 96.68 | 97.60 | 98.53 | Illumina 1M | 99.43             | 99.51 | 99.54 | 99.53 | 99.60 |
| Omni 2.5    | 95.98             | 96.97 | 97.37 | 98.18 | 98.72 | Omni 2.5    | 99.63             | 99.62 | 99.60 | 99.65 | 99.70 |
