# Supplementary material for: Efficiency and Power as a Function of Sequence Coverage, SNP Array Density, and Imputation
Source: PubMed Central journal article supplement (PMC3395607; doi:10.1371/journal.pcbi.1002604), 2012-07-12
Supplement: pcbi.1002604.s014.pdf [file pcbi.1002604.s014.pdf]

# Sensitivity and specificity by minor allele frequency

381 European sample reference panel

## Sens<sub>I</sub> for private variants

|           | 0x   | .5x   | 1x    | 2x    | 4x    |
|-----------|------|-------|-------|-------|-------|
| No Array  | NA   | 10.96 | 18.58 | 28.85 | 46.26 |
| Affy 100k | 0.46 | 11.06 | 18.69 | 30.53 | 45.18 |
| Affy 500k | 3.08 | 11.96 | 20.94 | 29.73 | 44.34 |
| Affy 6    | 4.13 | 13.49 | 20.97 | 31.32 | 44.87 |
| Ilmn 1M   | 4.07 | 13.69 | 21.10 | 29.42 | 47.58 |
| Omni 2.5  | 5.57 | 16.21 | 22.83 | 31.97 | 47.20 |

## Spec<sub>I</sub> for private variants

|           | 0x     | .5x   | 1x    | 2x    | 4x    |
|-----------|--------|-------|-------|-------|-------|
| No Array  | NA     | 98.22 | 99.11 | 99.47 | 99.68 |
| Affy 100k | 100.00 | 98.25 | 99.13 | 99.50 | 99.67 |
| Affy 500k | 92.70  | 98.45 | 99.21 | 99.49 | 99.67 |
| Affy 6    | 95.00  | 98.59 | 98.39 | 99.50 | 99.67 |
| Ilmn 1M   | 95.00  | 98.67 | 99.20 | 99.47 | 99.35 |
| Omni 2.5  | 96.48  | 98.91 | 99.27 | 99.52 | 99.68 |

## Sens<sub>I</sub> for .5% < MAF < 5% variants

|           | 0x    | .5x   | 1x    | 2x    | 4x    |
|-----------|-------|-------|-------|-------|-------|
| No Array  | NA    | 63.17 | 70.77 | 79.61 | 86.72 |
| Affy 100k | 17.94 | 64.27 | 70.29 | 79.21 | 86.19 |
| Affy 500k | 49.06 | 66.84 | 71.44 | 80.06 | 86.61 |
| Affy 6    | 57.66 | 68.39 | 72.69 | 80.27 | 87.19 |
| Ilmn 1M   | 62.71 | 70.26 | 73.70 | 80.37 | 86.65 |
| Omni 2.5  | 69.20 | 73.77 | 76.17 | 82.27 | 87.65 |

## Spec<sub>I</sub> for .5% < MAF < 5% variants

|           | 0x    | .5x   | 1x    | 2x    | 4x    |
|-----------|-------|-------|-------|-------|-------|
| No Array  | NA    | 99.45 | 99.34 | 99.57 | 99.53 |
| Affy 100k | 98.75 | 99.35 | 99.42 | 99.51 | 99.48 |
| Affy 500k | 99.15 | 99.29 | 99.40 | 99.59 | 99.50 |
| Affy 6    | 99.42 | 99.45 | 99.51 | 99.54 | 99.57 |
| Ilmn 1M   | 99.48 | 99.49 | 99.47 | 99.52 | 99.54 |
| Omni 2.5  | 99.51 | 99.63 | 99.57 | 99.67 | 99.64 |

## Sens<sub>I</sub> for MAF > 5% variants

|           | 0x    | .5x   | 1x    | 2x    | 4x    |
|-----------|-------|-------|-------|-------|-------|
| No Array  | NA    | 87.47 | 92.49 | 95.22 | 96.96 |
| Affy 100k | 26.93 | 87.98 | 92.68 | 95.22 | 96.91 |
| Affy 500k | 74.08 | 90.85 | 93.77 | 95.44 | 96.98 |
| Affy 6    | 86.55 | 92.82 | 94.51 | 95.91 | 97.17 |
| Ilmn 1M   | 93.58 | 95.39 | 95.91 | 96.71 | 97.66 |
| Omni 2.5  | 96.07 | 96.57 | 96.80 | 97.21 | 97.87 |

## Spec<sub>I</sub> for MAF > 5% variants

|           | 0x    | .5x   | 1x    | 2x    | 4x    |
|-----------|-------|-------|-------|-------|-------|
| No Array  | NA    | 99.42 | 99.50 | 99.70 | 99.75 |
| Affy 100k | 97.47 | 99.34 | 99.50 | 99.68 | 99.73 |
| Affy 500k | 98.62 | 99.40 | 99.49 | 99.61 | 99.71 |
| Affy 6    | 99.26 | 99.50 | 99.49 | 99.63 | 99.68 |
| Ilmn 1M   | 99.67 | 99.73 | 99.75 | 99.78 | 99.81 |
| Omni 2.5  | 99.77 | 99.79 | 99.78 | 99.81 | 99.85 |
