# Supplementary material for: Efficiency and Power as a Function of Sequence Coverage, SNP Array Density, and Imputation
Source: PubMed Central journal article supplement (PMC3395607; doi:10.1371/journal.pcbi.1002604), 2012-07-12

Properties of resolved SNPs with  $\geq 25\%$  discordant genotypes

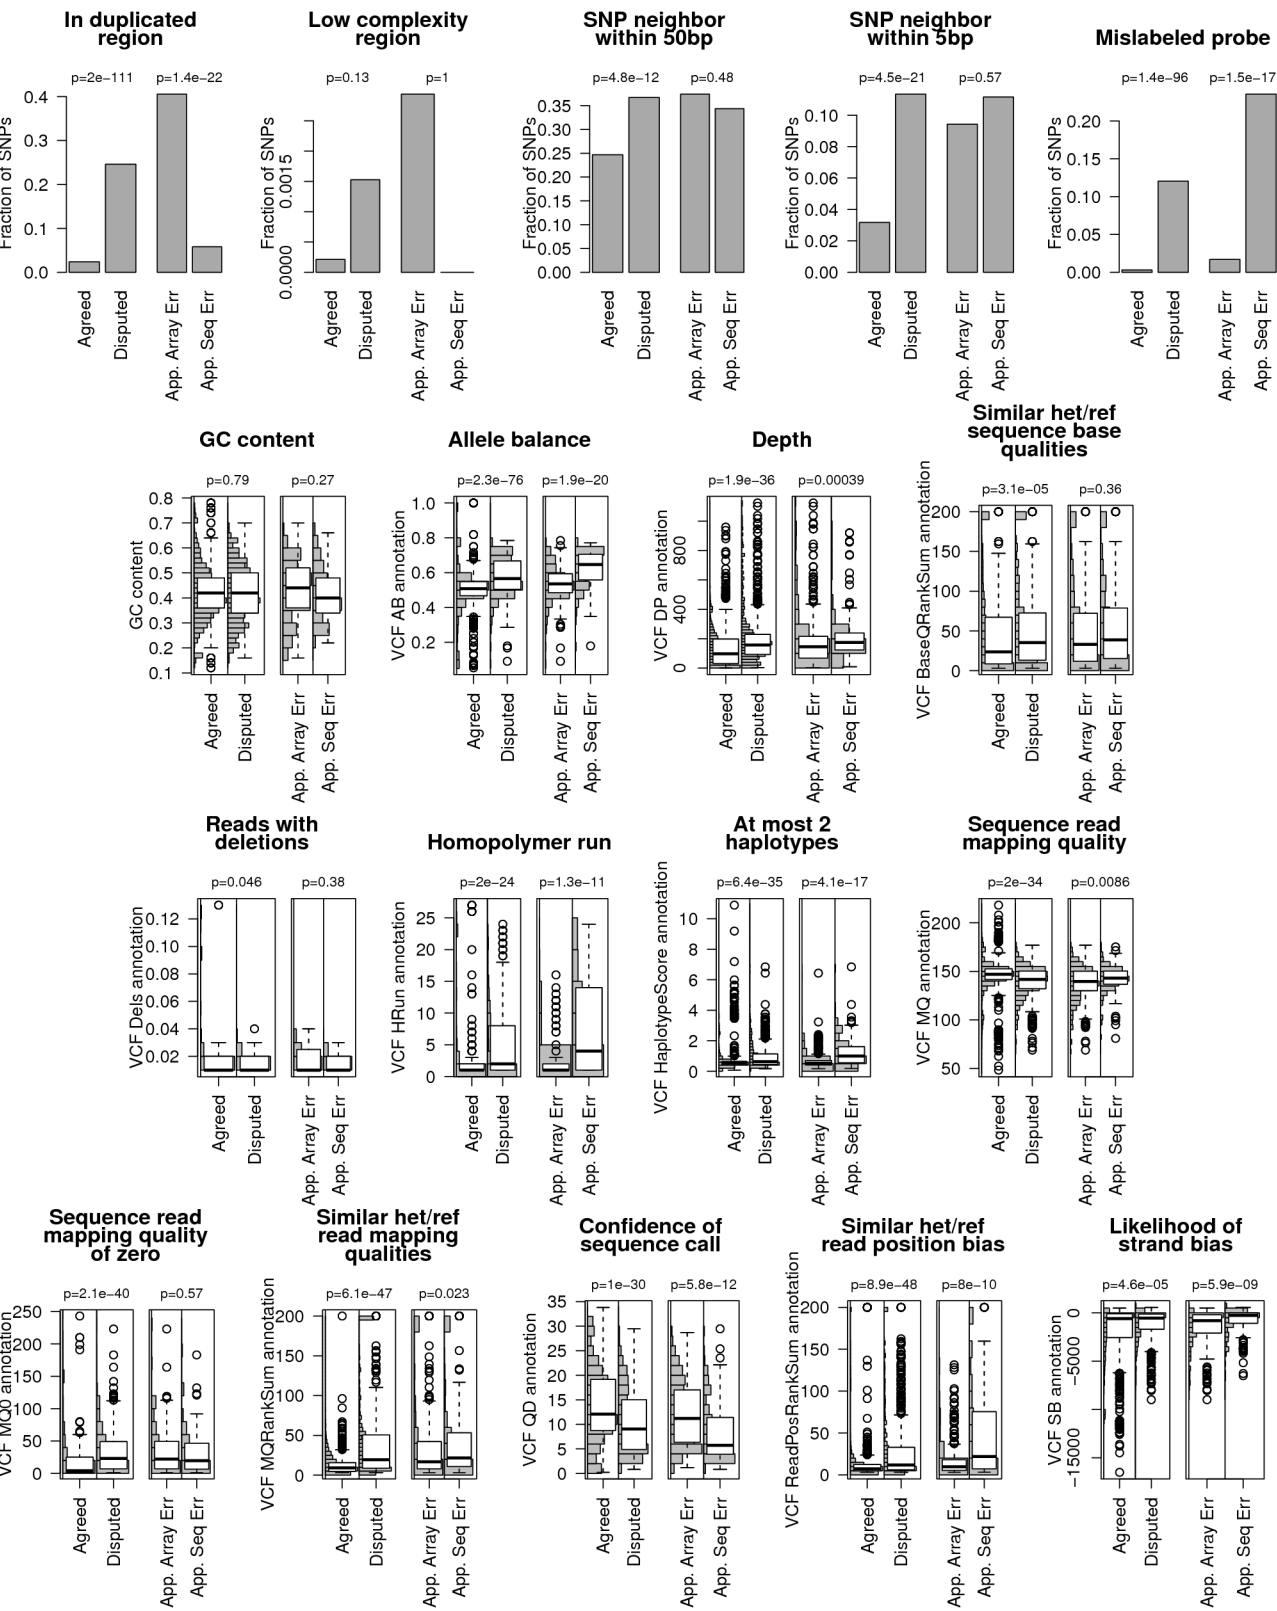

Supplement: pcbi.1002604.s025.pdf [file pcbi.1002604.s025.pdf]
