# Supplementary material for: Efficiency and Power as a Function of Sequence Coverage, SNP Array Density, and Imputation
Source: PubMed Central journal article supplement (PMC3395607; doi:10.1371/journal.pcbi.1002604), 2012-07-12
Supplement: pcbi.1002604.s026.pdf [file pcbi.1002604.s026.pdf]

**a**

**Number of characterized SNPs with  $\geq 10\%$  discordant genotypes (LOD 2)**

| Metric                                  | Apparent Array Err<br>(867 SNPs) | Apparent Seq Err<br>(2245 SNPs) | Unresolved<br>(204 SNPs) |
|-----------------------------------------|----------------------------------|---------------------------------|--------------------------|
| In duplicated region                    | 246                              | 89                              | 29                       |
| SNP neighbor within 50bp                | 340                              | 784                             | 89                       |
| SNP neighbor within 5bp                 | 103                              | 337                             | 33                       |
| Mislabeled probe                        | 8                                | 118                             | 24                       |
| Allele balance                          | 0                                | 191                             | 4                        |
| Similar het/ref sequence base qualities | 0                                | 0                               | 0                        |
| Homopolymer run                         | 0                                | 0                               | 0                        |
| At most 2 haplotypes                    | 2                                | 38                              | 24                       |
| Sequence read mapping quality           | 5                                | 1                               | 3                        |
| Sequence read mapping quality of zero   | 2                                | 1                               | 0                        |
| Similar het/ref read mapping qualities  | 0                                | 0                               | 0                        |
| Confidence of sequence call             | 0                                | 0                               | 0                        |
| Similar het/ref read position bias      | 3                                | 117                             | 15                       |
| Likelihood of strand bias               | 1                                | 1                               | 1                        |
| <b>Total</b>                            | <b>528</b>                       | <b>1114</b>                     | <b>143</b>               |

**b**

**Number of characterized SNPs with  $\geq 25\%$  discordant genotypes (LOD 2)**

| Metric                                  | Apparent Array Err<br>(351 SNPs) | Apparent Seq Err<br>(225 SNPs) | Unresolved<br>(96 SNPs) |
|-----------------------------------------|----------------------------------|--------------------------------|-------------------------|
| In duplicated region                    | 142                              | 13                             | 10                      |
| SNP neighbor within 50bp                | 131                              | 77                             | 38                      |
| SNP neighbor within 5bp                 | 33                               | 25                             | 18                      |
| Mislabeled probe                        | 6                                | 53                             | 22                      |
| Allele balance                          | 0                                | 0                              | 0                       |
| Similar het/ref sequence base qualities | 0                                | 0                              | 0                       |
| Homopolymer run                         | 0                                | 0                              | 0                       |
| At most 2 haplotypes                    | 2                                | 19                             | 19                      |
| Sequence read mapping quality           | 3                                | 0                              | 1                       |
| Sequence read mapping quality of zero   | 1                                | 1                              | 0                       |
| Similar het/ref read mapping qualities  | 0                                | 0                              | 0                       |
| Confidence of sequence call             | 0                                | 0                              | 0                       |
| Similar het/ref read position bias      | 0                                | 4                              | 3                       |
| Likelihood of strand bias               | 0                                | 6                              | 0                       |
| <b>Total</b>                            | <b>241</b>                       | <b>148</b>                     | <b>72</b>               |
